# Supplementary material for: Identification of Key TRIM Genes Involved in Response to Pseudomonas aeruginosa or Chlamydia spp. Infections in Human Cell Lines and in Mouse Organs
Source: MDPI journal article supplement (doi:10.3390/ijms241713290), 2023-08-27
Supplement: s1 [file s1]

**Table S1.** Primers used in this study.

| Human genes | Primer sequences (forward/reverse)                        | T, °C |
|-------------|-----------------------------------------------------------|-------|
| 18s         | F: CGGCTACCACATCCAAGGAA R: GCTGGAATTACCGCGGCT             | 60    |
| RNA         |                                                           |       |
| IFNA        | F: CCTGATGAATGCGGACTCCA R: TAGCAGGGGTGAGAGTCTTTG          | 63    |
| IFNB        | F: AGAAGGAGGACGCCGCATTG R: CCACTCTGACTATGGTCCAGGC         | 60    |
| IFNG        | F: ACTAGGCAGCCAACCTAAGC R: TTGGAAGCACCAGGCATGAA           | 60    |
| TNFA        | F: CTCCAGGCGGTGCTTGTT R: AGGCTTGCTACTCGGGGT               | 60    |
| IL1B        | F: GCTCGCCAGTGAAATGATGG R: GTCCTGGAAGGAGCACTTCAT          | 60    |
| IL6         | F: CCTTCCAAAGATGGCTGAAA R: CAGGGGTGGTTATTGCATCT           | 60    |
| TRIM1       | F: CGCCACGAGGCCTGTATAAT R: CTGGGGTGTGGCTCTTCTTT           | 60    |
| TRIM2       | F: AGGAGTGGCCGTATGGAAC R: AGAAAGTGTGCAGACAGGGG            | 60    |
| TRIM3       | F: GCAAACGAAAGGACAACCC R: TGCTGTCTGCTACCACGATG [3]        | 55    |
| TRIM4       | F: ATGCTAAAGCGATTCCAAGTG R: CAAGAACTGGCTGATGCTGTAT [3]    | 60    |
| TRIM5α      | F: CGACGCTACTGGGTGATGT R: ACTTTGAGAGCCCAGGATGC            | 60    |
| TRIM6       | F: GTGCGGGTCAGAGAGGATTC R: CCTGCCATTGTTGGTGTGATGC         | 60    |
| TRIM7       | F: GGCGAACCCTTCAAGCTCTA R: TCAGGCCTCTGTAATGTCCC           | 60    |
| TRIM8       | F: GACGGAGGATGTCAGCTTCA R: TCGTTCAGGAAGAGCTTGA [3]        | 55    |
| TRIM9       | F: ATTCGGGAGGTGTATGTGG R: CACCACCCGGTCATCATAGC            | 60    |
| TRIM10      | F: GGATGCAAGTCCTCCTGACTC R: TCCCGTTGCCTCAAGATGTC          | 55    |
| TRIM11      | F: CGTCTTCGCCGTTTGCT R: CCTCAGCTCCATAGGCACAA [3]          | 65    |
| TRIM13      | F: CTTGTCTATTGTCTTTGGTCT R: ATTCTGCCACATTGTTCACTACC [3]   | 60    |
| TRIM14      | F: CATTACAGACGCCATTGGACAT R: TGGTGAGGGGCTGGTTTTC          | 60    |
| TRIM15      | F: CAGCCAGCAAGTGAGCTTCTA R: CCAGAGTGATGACCCCTGAAT         | 55    |
| TRIM16      | F: GTGGCCACACCATAGTCTCC R: GCTTTGACCTCTGACACCGA           | 60    |
| TRIM17      | F: ACGCATTGTGCTGGAGTTTG R: CTGCTCAGGGGTTCTTCAT [3]        | 55    |
| TRIM18      | F: AAAGCCACTCACCCGAATAA R: TTCTCATCTCATGCTCAA [3]         | 60    |
| TRIM19      | F: CGGAAGACTCAGATGCCGAA R: ACACGGCCTTGAGTAGATG            | 60    |
| TRIM20      | F: CCACTCTGCTGGTCACCTACTAT R: GGAATCATCTGTGCCGTTT [3]     | 60    |
| TRIM21      | F: GAAGCTCCAGGTGGCATTAG R: GCACAACTCTGCGTGAATC [3]        | 60    |
| TRIM22      | F: TTATATCCAGATCGAGAGACAGAAG R: CATGACGTCAATCACATCCTGC    | 60    |
| TRIM23      | F: TGCCAGCATCCCTGTCACT R: TCCTAACGTAACGACCCGAAT [3]       | 60    |
| TRIM24      | F: CCCATCCAGCAACCTTCCAT R: TGCCTAGTAATCGTGGGGC            | 60    |
| TRIM25      | F: AGCATCAAACTGCGAGGAAT R: GGGAGGTTTCTTGGAATTCTTT [3]     | 60    |
| TRIM26      | F: GAGGGAATTCCAGGGGAAGC R: GTGCAGGTAGGCACTCTTGT           | 60    |
| TRIM27      | F: CCAGAACCAGCTCGACCATT R: GGAGGCGATACTCATGCTCC           | 60    |
| TRIM28      | F: GCGGAAATGTGAGCGTGTA R: AGAAGGTGGAGTCGGTAGCC [3]        | 60    |
| TRIM29      | F: ATCGGCAACAAGCAGAAGG R: ATGATTCTTGCTCCTGGAAC [3]        | 65    |
| TRIM31      | F: TCGTCTGCTGGGAAAGTCAC R: TCACAAAACCAAGCCCGGAT           | 60    |
| TRIM32      | F: AATCGGCAGAATGAGCACCA R: CTTGCGACTACTGTCAGCCA           | 60    |
| TRIM33      | F: GCCCTGTCTTCACTCCTTCT R: GCATTCTTGGCGGCATACT [3]        | 60    |
| TRIM34      | F: TCAGATGTGGAGTGTGCGAGT R: TGATTCCACTCATGTCCTGC [3]      | 60    |
| TRIM35      | F: CATCGCCAAGCACAATCAG R: GCTCCTCACTCTCAAGAACTC [3]       | 60    |
| TRIM36      | F: TCCAATACTAATTTCAGACCCA R: CCAACTTACACAGATGGCAAAC [3]   | 60    |
| TRIM37      | F: TCAGCTGTATTAGGCGCTGG R: AAGTGCACACTGATGGCAGA           | 60    |
| TRIM38      | F: GCCAGGGCTACAAGGAAAAG R: GCTTCTGCTCCGTACATCTGTC [3]     | 60    |
| TRIM39      | F: TACCGCAGTCTCCGACCTAA R: AGCCTCTGGTCTCATAACA [3]        | 60    |
| TRIM40      | F: GCGGCCAGAATCCTTGACAT R: AAGTCACCAGCATTCTTCAGTG         | 65    |
| TRIM41      | F: GAGGTGGTGCAGGAGTACAAG R: TCCTCCTTGGCTTTCATCTTC [3]     | 60    |
| TRIM42      | F: TGCTATGTGCGTTTGCTGTC R: CGCTCTGAGGTGAAGATGAAC [3]      | 60    |
| TRIM43      | F: TTCCTCTGGAGGGGCAATGT R: CACTCCTTGCCACGATGTCT           | 60    |
| TRIM44      | F: TCCAGTCATTGGGGCTCAC R: TCCCGAGTTACTTTAGGGTCTG [3]      | 60    |
| TRIM45      | F: AAGACAGCCCAGTCAGAACAAT R: CAGAAGGTGCAGCAGTGAAAC [3]    | 60    |
| TRIM46      | F: TGCTTGAGAACCCCGACA R: TCGTGGTCCTTGCTGATAG [3]          | 60    |
| TRIM47      | F: TGATGCTGAGCCCCAAGAC R: CCAGTAGTAGGTGCCTCGGT [3]        | 60    |
| TRIM48      | F: CTCAGGAGCACCGGTATCAC R: TGTCTCCAAAAGCCTTCCAGT          | 65    |
| TRIM49      | F: GGAATCTTACAGGTCTTTCAGGG R: GTTTATCTGCTCGGTTGACTTTG [3] | 60    |
| TRIM50      | F: ATCGCCAACTGGTGAACAA R: TGAAGACATCCGACTCATTGAC [3]      | 60    |
| TRIM51      | F: GCCTCAGTGGATTACAGAGTTGAT R: AGATGTGAAAGCCTGAGCCC       | 60    |
| TRIM52      | F: CTTTCGTCCCAACTTGCAGC R: AGTTGTTCCAACCTTATTTCCTGG       | 60    |
| TRIM54      | F: ATCCTCTATGGCAGTCCCG R: CCTGGATGACTCCTGCTTGTA [3]       | 60    |
| TRIM55      | F: CCCAAGTCATTACCCGAACC R: TGCCTTTGATGCTTCCGAG [3]        | 60    |
| TRIM56      | F: AGGATGGTGGGAAAGACGG R: CTCCTCTTCTCGGGTTGTC [3]         | 60    |

|             |                                                             |       |
|-------------|-------------------------------------------------------------|-------|
| TRIM58      | F: GCAGAAGTAAGGCTGTCACAAG R: AATCGCTCAGGGTTGTTGG [3]        | 60    |
| TRIM59      | F: CGTGTACTGCCATGCTCTCA R: TGTTCAAGGCAGGTGACAAT             | 60    |
| TRIM60      | F: ACCCCCAGCTCCGTAATTTG R: ATTCCTCAAGGGCTCAAGGC             | 60    |
| TRIM61      | F: AAGAAGCAAGAAGAGGAAGAGGC R: ACGGTGCATTGTATTCCTCCA         | 60    |
| TRIM62      | F: CAGTACACCATCTGGAAGTCCC R: CAAGTTGCCGTAAGCCACA [3]        | 60    |
| TRIM63      | F: GAGGATTCCCGTCGAGTGAC R: GTTGCTTGGCAGTCAAGAGG             | 60    |
| TRIM64      | F: AAAGCCCCAGCCAGTGAA R: GTGGGAGCACTGAGATGGTC [3]           | 60    |
| TRIM65      | F: CCCAAGCACAGTTTGTCCAC R: GCGACAGATAGAAGTGACGGTT [3]       | 60    |
| TRIM66      | F: TGCACAGAGGAACACCGAC R: CGGGACCACCATTCACTC [3]            | 65    |
| TRIM67      | F: AGGAAAACGGACTGGACTACG R: CATCCACAAGGGCATCACA [3]         | 60    |
| TRIM68      | F: AATGGGGCTGAAGGGTGA R: CCATACAATACTCTGTTTTCGGG [3]        | 60    |
| TRIM69      | F: TGAGCATTCAAGGCAAAGACG R: TGGTTGCCAGCACCTTCAT [3]         | 60    |
| TRIM71      | F: AAGAAAGCCCTGGAGGAACG R: GGGTGTGAACATGACTCGGT             | 60    |
| TRIM72      | F: GGAGGAGACAGTGCCTCAGTT R: GCTCCAGGTAAGAGTTCAGGC [3]       | 60    |
| TRIM74      | F: CGGACCCGAATCGTCAATGAG R: TCCGAAGTGTCCAGCACAC             | 60    |
| TRIM75      | F: GCCCATAGAGAAAGCTGCCA R: TGGAGAGAACTGCCTGTTGC             | 60    |
| Mouse genes | Primer sequences (forward/reverse)                          | T, °C |
| 18s RNA     | F: GTAACCCGTTGAACCCATT R: CCATCCAATCGGTAGTAGCG              | 60    |
| IFNA        | F: ATGGCTAGGCTCTGTGCTTTCCT R: AGGGCTCTCCAGACTTCTGCTCTG      | 60    |
| IFNB        | F: TGAATGGAAAGATCAACCTCACCTA R: CTCTTCTGCATCTTCTCCGTCA      | 63    |
| IFNG        | F: AACTCAAGTGGCATAGATGTGGA R: TGCTGTTGCTGAAGAAGGTAGTA       | 63    |
| TNFA        | F: CCCTCACACTCAGATCATCTTCT R: GCTACGACGTGGGCTACAG           | 60    |
| IL1B        | F: GCAACTGTTCTGAACTCAACT R: ATCTTTGGGGTCCGTCAACT            | 60    |
| IL6         | F: TCTGGGAAATCGTGAAATGAG R: TCTCTGAAGGACTCTGGCTTTGTC        | 60    |
| TRIM1       | F: CAGTGGGAACCTTCTGGGAC R: CGCGGATCTTGAGGGTGAAA             | 60    |
| TRIM2       | F: AGCGACTCTGAAGAAGAGCAA R: GCACCTCTTGAGGACCAGTG            | 60    |
| TRIM3       | F: GGGGCCAAACAGAAGGTGTT R: TAGCAAAACCTCAGGGGCAG             | 55    |
| TRIM4       | F: ATGCTAAAGCGATTCCAAGTG R: CAAGAACTGGCTGATGCTGTAT          | 60    |
| TRIM6       | F: TCCAGGTATCAGCCACAGTG R: TAGGGACAAAGGGCAGAAGG             | 60    |
| TRIM7       | F: CTCTACTGCCAGGACGACG R: CTTCTCAAGACCCTCAGCC               | 60    |
| TRIM8       | F: GACGGAGGATGTCAGCTTCA R: TCGTTCAGGAAGAGCTTGGA             | 59    |
| TRIM9       | F: ATGGAAGAGATGGAAGA R: CGCACGCCTGACATAAATTG                | 55    |
| TRIM10      | F: GCTGGCTTGGGGCTTTGTTTCA R: CACTCGAGGGTCTGCTCCCAAGGGTGCTTG | 60    |
| TRIM11      | F: GCAGAAATGGCACGACGCCT R: GGAACAGCATTGCGTCCTCCA            | 60    |
| TRIM12      | F: AACGCTACTGGGTTCAGGTG R: CCCCCTGCGAAATAAAGGGT             | 60    |
| TRIM13      | F: AGGAGCAGCGGATGGCCTTCAACAT R: AGTGAACACACCTGTGTCTTGCGGC   | 60    |
| TRIM14      | F: CCCATTTGGAAGACGCCG R: AGGGTGGCTCAGCTCCG                  | 60    |
| TRIM15      | F: CCTGAGCGAGACCTACTGTGA R: AGAGCTTCTAACCAGACTCCTG          | 60    |
| TRIM16      | F: GTGTGACTTCTGTCTTGGGGC R: GGTCCACCTCTTTGTTCTCTGC          | 60    |
| TRIM17      | F: TTCCAAGAGGATGTGATGCCG R: TGTCTTCCGACTCACGTTG             | 65    |
| TRIM18      | F: AACACAGAACTGGAGACTCTTT R: CTTCTGTCAGTTTGGCTTCTTG         | 60    |
| TRIM19      | F: AGAGGAACCCTCCGAAGACT R: ATTCCTCCTGTATGGCTTGC             | 60    |
| TRIM20      | F: TGAAATGGCATTCAAGCGCTTC R: CCAAGGTGCTCCCAATGAATG          | 60    |
| TRIM21      | F: GTCGAGGATTCACGCAGAGT R: CCAGGATCCACTCCTTTCCA             | 60    |
| TRIM23      | F: CATAGGCGTGTGCCTCTAGC R: GGTCCAGTACTGAATGCTTGTG           | 60    |
| TRIM24      | F: GGTCTTCGCCATTGCGC R: TCTCAGCACACTCTTGACTGC               | 60    |
| TRIM25      | F: CAACTTCCCCTGATGCCG R: CCTCCAGTAGTGAATGCCG                | 60    |
| TRIM26      | F: TGCAGGATGTCTGCACTACAC R: CAGGGTGACGCTTACTGTCTT           | 60    |
| TRIM27      | F: GCAAATCCAGAACCGACTGG R: GAGTCAGGCTCAAAAGCTCAG            | 60    |
| TRIM28      | F: AGGATGCTAACCACTGCTGC R: ACTGATGGTCTTGTGAGCG              | 60    |
| TRIM29      | F: ACCTCCTGTGACCTTTGCTG R: GGTAGCTATTCCTGCGGACT             | 60    |
| TRIM30      | F: ACCTTAGAAATGCTGCAGGGTG R: TCCCAGGACACCCAAATGGTA          | 60    |
| TRIM31      | F: GCGCCAGAGACTAGATGAGG R: TGAAATTCTTACCCCTGCTCA            | 60    |
| TRIM32      | F: TCTCCATCGGTTCTGTTGGC R: GGCCCTCTCGAATAAGGACG             | 60    |
| TRIM33      | F: CTGTGGACCAAAGGAAATGTGA R: TCTTGTGTGTCTGCATAAACTTGA       | 60    |
| TRIM34      | F: GGGCTACTGGGACAACCTC R: TTTGGCTGACCTTTGCGTTG              | 60    |
| TRIM35      | F: CCAACCACACGCTCAACAAC R: GTTCTTACACTTGGCCCGGA             | 60    |
| TRIM36      | F: TGCCAAGGGCAAGGTGACTA R: TCGGGTCACTGAATTACGC              | 60    |
| TRIM37      | F: GGTCTCCAGGTAGTAGCCA R: CCTGCTCCTCGTTCTCAGTG              | 60    |
| TRIM38      | F: CACTTTGAGCAGGTGTGAGG R: GCTGACTTGGTGACGTCGTA             | 55    |
| TRIM39      | F: TCTTAAACAGCTAATTGCGGATG R: GTTGTAAGGACAGTGTGCCA          | 60    |

|        |                                                     |    |
|--------|-----------------------------------------------------|----|
| TRIM40 | F: ATGGGCTCTCTTGACAAGGAC R: ACTGAAGCCTTATCCATGTGC   | 60 |
| TRIM41 | F: CGAATCCAGGAGCCACAAAC R: TCCACATGCCCTTGTAGCTT     | 60 |
| TRIM42 | F: CCCAGGCCCAATTGTCATCT R: TGGTGTACCACCTTGCAGA      | 55 |
| TRIM44 | F: GTCCAGTCATTGGGGCTCAC R: TCCACCGGAATCTTTGCTTCTC   | 60 |
| TRIM45 | F: CCAGGCTCATAGGCGACAG R: CTACACAGTCCCGACACACC      | 60 |
| TRIM46 | F: ATGCAGACCTTCACTTCCATCA R: GGGCACAGCAGTTCCTTCTC   | 60 |
| TRIM47 | F: GTGGAGCGTGTGTGCCTTT R: GTTCATCCATGCGGTCCTCC      | 60 |
| TRIM50 | F: GCGCTTCGACTATAGCACCT R: GTAAGTAGACGCCGATGCGA     | 60 |
| TRIM52 | F: AGCCCTATGCAGTCACTTCG R: TTTGCATTGCCCTGATGCTG     | 60 |
| TRIM54 | F: AGCTGATCAACAAGGTCGGG R: CTCCCCATCCAAAGCCATGT     | 55 |
| TRIM55 | F: CAAAGCCGGAACAGCTC R: GCCTCAAATCCAATCTGAGAGG      | 65 |
| TRIM56 | F: TACAGAGCCGGGTGGTATGA R: GCAGGGGTGATCGATATGGG     | 60 |
| TRIM58 | F: GTTCTGCGAGAAGTCGGACA R: GCTCGGAGCATCCTCTGGTA     | 65 |
| TRIM59 | F: CATATGGAGGCCTCTGCGAA R: GGTGACAACATCTGGGTGGT     | 60 |
| TRIM60 | F: CTGTGTGAGGGATCGGGATG R: GGCGCTCTCTAGGACTTTCC     | 60 |
| TRIM61 | F: GGTATGCCGAACGGTTCTCT R: GTAAGGCCAAAATGTGCCCC     | 55 |
| TRIM62 | F: ACGATGCCTTCGAGGAGTT R: CTGTCCTGAAGGGCCTGA        | 60 |
| TRIM63 | F: GGGCTACCTTCCTCTCAAGTG R: TTTACCTCTGTGGTCACGC     | 60 |
| TRIM65 | F: AGATGCTGGCCCTTTGGAGA R: AGTGCAAATACTGGTTGGCG     | 60 |
| TRIM66 | F: AGCCACACTGCTCTACAGATG R: CAGGAGATGAGCTTACCTGGG   | 55 |
| TRIM67 | F: TGGAGCCCAAAGTATCTGCG R: GGTGGCAATTCATCTGGACG     | 60 |
| TRIM68 | F: CGCTGGATGCTGCAGGGTAT R: TCTGGATCTAGACGCACATCCACT | 60 |
| TRIM69 | F: ATTCTCTCTCCAGGCCCATCT R: AGCCAGAATCCTTGCTCTGG    | 55 |
| TRIM71 | F: GATCGGGAGTGTGAGCTGTT R: TGCAGGAACAGAGACTTCGC     | 60 |
| TRIM72 | F: CCCGACGTACTTACGCCAAT R: CATTCTTGCCCTTGTCGTGC     | 60 |
| TRIM75 | F: GACCTGAAGACAGCCCATCC R: AGCTCCTGAGACGTTGAAGC     | 60 |



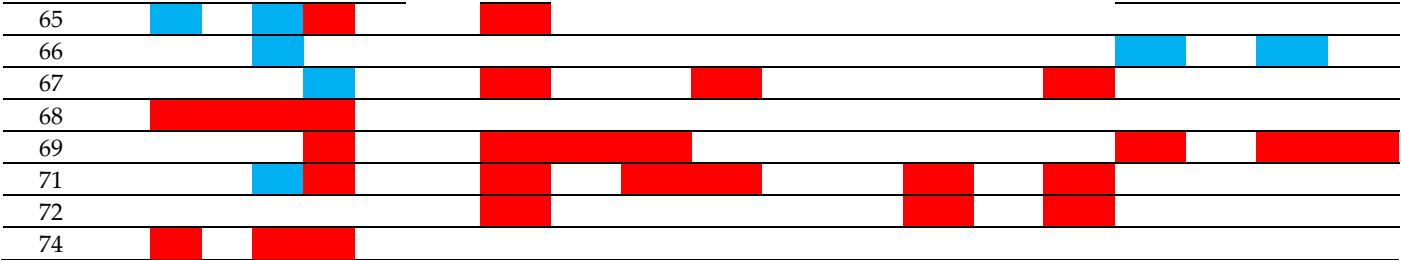

*H.s.*, *Homo sapiens*, *CT*, *Chlamydia trachomatis*, *CP*, *Chlamydia pneumoniae*, *PA*, *Pseudomonas aeruginosa*, *CM*, *Chlamydia muridarum*, TLR, Toll-like receptor, TNF, tumor necrosis factor, MDM, monocyte derived macrophages, PBL, peripheral blood lymphocytes, Nd, not determined, Ne, no expression.

THP1 cells, a human monocyte cell line. MDM or PBL were cultivated in the presence or absence of IFN I (Universal type I IFN is a hybrid alpha interferon, constructed from recombinant human IFN- $\alpha$  A and human IFN- $\alpha$  D) or IFN II (IFN $\gamma$ ) [16].  
\* [52]

**Table S3.** Comparison of *TRIM* expression in mouse organs after bacterial infections (qPCR from this work, RNA-seq data from [17] and [18]), in human macrophages and lymphocytes upon different infections and various stimuli [15,16]. Red, up-regulation of gene expression,  $p < 0.05$ , blue, down-regulation of gene expression,  $p < 0.05$ . More light colors demonstrate tendency without significance.

|             | <i>M.m.</i><br>lung | <i>M.m.</i><br>lung | <i>M.m.</i><br>lymph<br>nodes | <i>M.m.</i><br>lymph<br>nodes | <i>H.s.</i><br>macrophag<br>es<br>[15] | <i>H.s.</i> MDM<br>or PBL<br>[16] | <i>H.s.</i> MDM<br>or PBL<br>[16] | <i>M.m.</i> lung<br>[18]  | <i>M.m.</i> lung<br>[17] |
|-------------|---------------------|---------------------|-------------------------------|-------------------------------|----------------------------------------|-----------------------------------|-----------------------------------|---------------------------|--------------------------|
| <i>TRIM</i> | CM                  | PA                  | CM                            | PA                            | TLR<br>stimulation                     | IFN I                             | IFN II                            | CM, 7 days<br><i>p.i.</i> | PA, 24 h <i>p.i.</i>     |
| 1           |                     |                     |                               |                               |                                        |                                   |                                   |                           |                          |
| 2           |                     |                     |                               |                               |                                        |                                   |                                   |                           |                          |
| 3           |                     |                     |                               |                               |                                        |                                   |                                   |                           |                          |
| 6           |                     |                     |                               |                               | 3,4                                    |                                   |                                   |                           |                          |
| 7           |                     |                     |                               |                               | 2,5                                    |                                   |                                   |                           |                          |
| 8           |                     |                     |                               |                               |                                        |                                   |                                   |                           |                          |
| 9           |                     |                     |                               |                               |                                        |                                   |                                   |                           |                          |
| 10          |                     |                     |                               |                               | 1-5,7-9,<br>TNF                        |                                   |                                   |                           |                          |
| 11          |                     |                     |                               |                               |                                        |                                   |                                   |                           |                          |
| 12          |                     |                     |                               |                               |                                        |                                   |                                   | Trim12c                   |                          |
| 13          |                     |                     |                               |                               | 1-5,8,9*                               |                                   |                                   |                           |                          |
| 14          |                     |                     |                               |                               | 3,4                                    |                                   |                                   |                           |                          |
| 15          |                     |                     |                               |                               | 2-5,8,9,TNF                            |                                   |                                   |                           |                          |
| 16          |                     |                     |                               |                               |                                        |                                   |                                   |                           |                          |
| 17          |                     |                     |                               |                               |                                        |                                   |                                   |                           |                          |
| 18          |                     |                     |                               |                               | 2,6                                    |                                   |                                   |                           |                          |
| 19          |                     |                     |                               |                               | 3,4                                    |                                   |                                   |                           |                          |
| 20          |                     |                     | Ne                            | Ne                            | 3,4                                    |                                   |                                   |                           |                          |
| 21          |                     |                     |                               |                               | 3,4                                    |                                   |                                   |                           |                          |
| 23          |                     |                     |                               |                               |                                        |                                   |                                   |                           |                          |
| 24          |                     |                     |                               |                               |                                        |                                   |                                   |                           |                          |
| 25          |                     |                     |                               |                               | 3,4                                    |                                   |                                   |                           |                          |
| 26          |                     |                     |                               |                               | 3                                      |                                   |                                   |                           |                          |
| 27          |                     |                     |                               |                               |                                        |                                   |                                   |                           |                          |
| 28          |                     |                     |                               |                               |                                        |                                   |                                   |                           |                          |
| 29          |                     |                     |                               |                               | 1-5,7-9,TNF                            |                                   |                                   |                           |                          |
| 30          |                     |                     |                               |                               |                                        |                                   |                                   |                           |                          |
| 31          |                     |                     | Ne                            | Ne                            | 2,3,4,5,8,TN<br>F                      |                                   |                                   |                           |                          |
| 32          |                     |                     |                               |                               |                                        |                                   |                                   |                           |                          |
| 33          |                     |                     |                               |                               |                                        |                                   |                                   |                           |                          |
| 34          |                     |                     |                               |                               | 3,4                                    |                                   |                                   |                           |                          |
| 35          |                     |                     |                               |                               |                                        |                                   |                                   |                           |                          |
| 37          |                     |                     |                               |                               | 1                                      |                                   |                                   |                           |                          |
| 38          |                     |                     |                               |                               | 3                                      |                                   |                                   |                           |                          |
| 39          |                     |                     |                               |                               |                                        |                                   | 8                                 |                           |                          |
| 41          |                     |                     |                               |                               | 4                                      |                                   |                                   |                           |                          |
| 44          |                     |                     |                               |                               |                                        |                                   |                                   |                           |                          |
| 45          |                     |                     |                               |                               |                                        |                                   |                                   |                           |                          |
| 46          |                     |                     |                               |                               |                                        |                                   |                                   |                           |                          |
| 47          |                     |                     |                               |                               |                                        |                                   |                                   |                           |                          |
| 50          |                     |                     |                               |                               | 2,4,5,8,TNF                            |                                   |                                   |                           |                          |
| 52          |                     |                     |                               |                               |                                        |                                   |                                   |                           |                          |
| 54          |                     |                     |                               |                               |                                        |                                   |                                   |                           |                          |
| 55          |                     |                     |                               |                               | 1,6,7,TNF                              |                                   |                                   |                           |                          |
| 56          |                     |                     |                               |                               | 3,4                                    |                                   |                                   |                           |                          |
| 58          |                     |                     | Ne                            | Ne                            | 2                                      |                                   |                                   |                           |                          |
| 59          |                     |                     |                               |                               | 3,4                                    |                                   |                                   |                           |                          |
| 60          |                     |                     |                               |                               | 2-5, 7-9,<br>TNF                       |                                   |                                   |                           |                          |
| 61          |                     |                     |                               |                               | 1-5,7-9,TNF                            |                                   |                                   |                           |                          |
| 62          |                     |                     |                               |                               |                                        |                                   |                                   |                           |                          |
| 63          |                     |                     |                               |                               | 2,5                                    |                                   |                                   |                           |                          |

|    |  |    |    |              |  |
|----|--|----|----|--------------|--|
| 65 |  |    |    | 2            |  |
| 67 |  |    |    | 2,5,TNF      |  |
| 68 |  |    |    |              |  |
| 69 |  |    |    | 2,3,4        |  |
| 71 |  | Ne | Ne | 2,4,5,8, TNF |  |
| 72 |  |    |    | 2,8,TNF      |  |

*H.s.*, *Homo sapiens*, *M.m.*, *Musculus*, *PA*, *Pseudomonas aeruginosa*, *CM*, *Chlamydia muridarum*, TLR, Toll-like receptor, TNF, tumor necrosis factor, MDM, monocyte derived macrophages, PBL, peripheral blood lymphocytes, Nd, not determined, Ne, no expression.

\* [52]
